# Supplementary material for: Chemical Profile Characterization of Fruit and Vegetable Juices after Fermentation with Probiotic Strains
Source: MDPI journal article supplement (doi:10.3390/foods13071136), 2024-04-08
Supplement: s1 [file s1]

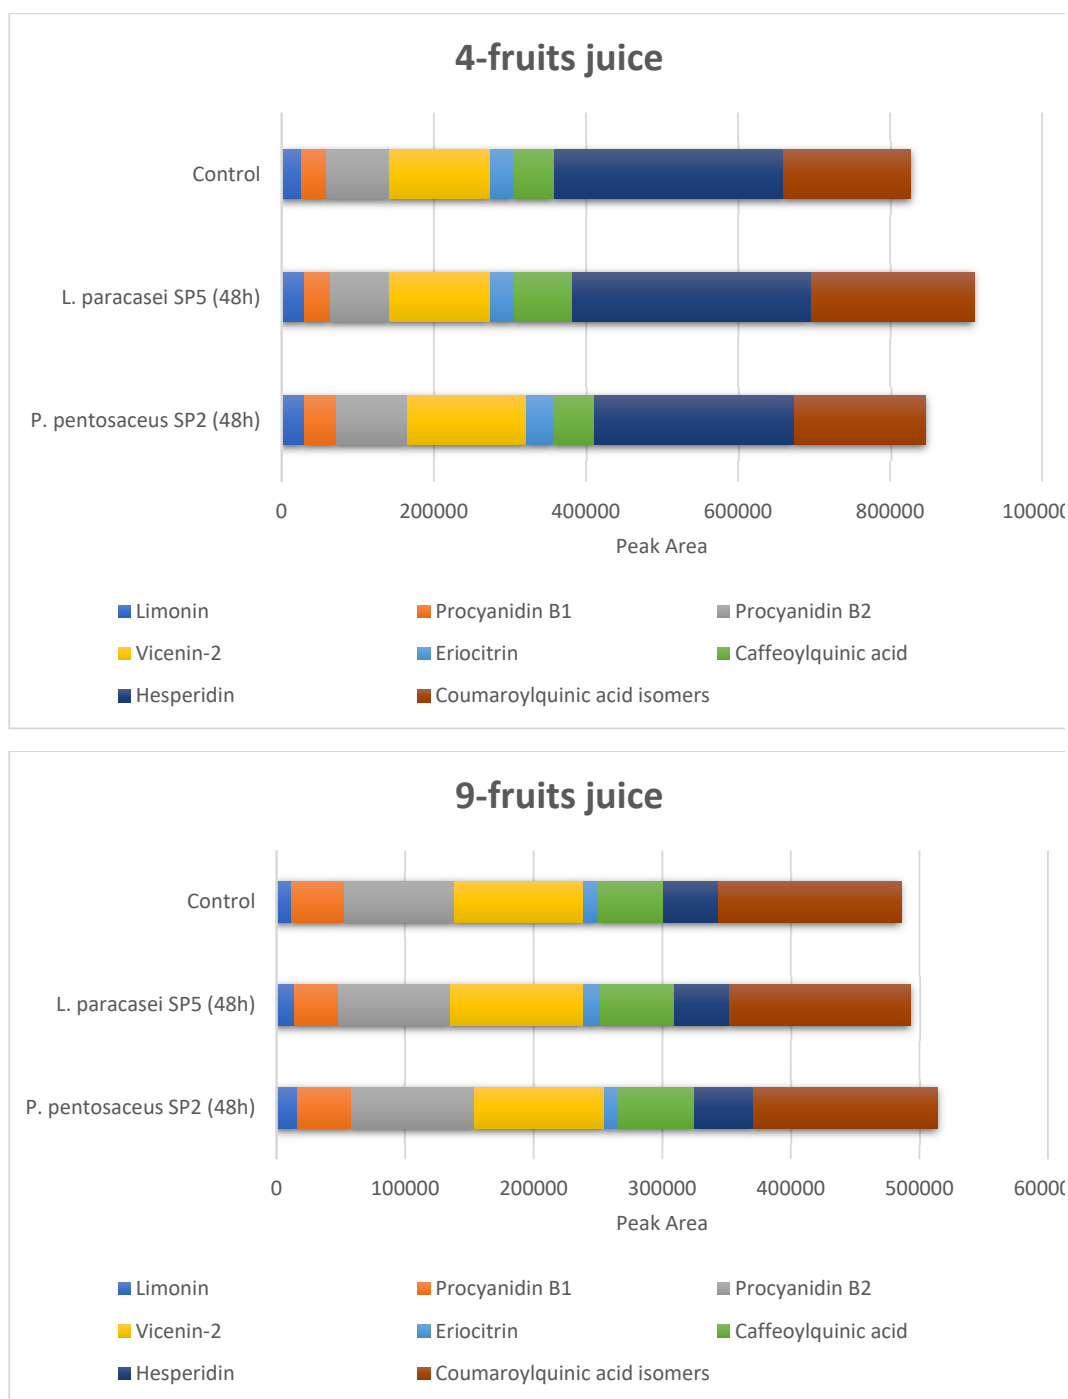

**Figure S1.** Variation of suspect phenolic compounds in juices before and after fermentation with *P. pentosaceus* SP2 and *L. paracasei* SP5.
